# Supplementary material for: Transcriptome Analysis of Propylaea quatuordecimpunctata L. (Coleoptera: Coccinellidae) under High Temperature Stress
Source: MDPI journal article supplement (doi:10.3390/agriculture12081088), 2022-07-23
Supplement: s1 [file s1]

**Supplemental Table S1.** GO enrichment analysis (the DEGs number in per pathway) of adults of *P. quatuordecimpunctata* under different temperature stress.

| Groups     | Pathway ID                                               | DEGs |     |      |
|------------|----------------------------------------------------------|------|-----|------|
|            |                                                          | All  | Up  | Down |
| 35 vs 32°C | catalytic activity                                       | 91   | 74  | 17   |
|            | hydrolase activity                                       | 42   | 36  | 6    |
|            | transferase activity, transferring glycosyl groups       | 10   | 10  | -    |
|            | hydrolase activity, acting on glycosyl bonds             | 9    | 9   | -    |
|            | flavin adenine dinucleotide binding                      | 7    | 4   | 3    |
|            | oxidoreductase activity, acting on CH-OH group of donors | 7    | 4   | 3    |
|            | monooxygenase activity                                   | 6    | 6   | -    |
|            | oxidoreductase activity, acting on paired donors ...     | 6    | 6   | -    |
|            | alpha, alpha-trehalase activity                          | 3    | 3   | -    |
|            | trehalase activity                                       | 3    | 3   | -    |
|            | formyltetrahydrofolate dehydrogenase activity            | 2    | -   | 2    |
|            | xanthine dehydrogenase activity                          | 2    | -   | 2    |
|            | xanthine oxidase activity                                | 2    | -   | 2    |
|            | oxidoreductase activity, acting on CH or CH2 groups...   | 2    | -   | 2    |
|            | oxidoreductase activity, acting on CH or CH2 groups...   | 2    | -   | 2    |
|            | molybdopterin cofactor binding                           | 2    | -   | 2    |
|            | carbohydrate metabolic process                           | 11   | 7   | 4    |
|            | plasma membrane bounded cell projection organization     | 4    | 4   | -    |
|            | disaccharide metabolic process                           | 3    | 3   | -    |
|            | trehalose metabolic process                              | 3    | 3   | -    |
|            | oligosaccharide metabolic process                        | 3    | 3   | -    |
|            | coenzyme catabolic process                               | 2    | -   | 2    |
|            | 10-formyltetrahydrofolate metabolic process              | 2    | -   | 2    |
|            | 10-formyltetrahydrofolate catabolic process              | 2    | -   | 2    |
|            | folic acid-containing compound catabolic process         | 2    | -   | 2    |
|            | cellular modified amino acid catabolic process           | 2    | -   | 2    |
|            | pteridine-containing compound catabolic process          | 2    | -   | 2    |
|            | cell-matrix adhesion                                     | 2    | 2   | -    |
|            | cell-substrate adhesion                                  | 2    | 2   | -    |
|            | dicarboxylic acid catabolic process                      | 2    | -   | 2    |
| 38 vs 35°C | catalytic activity                                       | 185  | 124 | 61   |
|            | oxidoreductase activity                                  | 58   | 49  | 9    |
|            | cofactor binding                                         | 29   | 21  | 8    |
|            | monooxygenase activity                                   | 14   | 10  | 4    |
|            | oxidoreductase activity, acting on paired donors ...     | 12   | 8   | 4    |
|            | hydroxymethyl-, formyl- and related transferase          | 6    | 6   | -    |
|            | small molecule metabolic process                         | 42   | 33  | 9    |
|            | oxidation-reduction process                              | 36   | 31  | 5    |
|            | carboxylic acid metabolic process                        | 24   | 21  | 3    |
|            | oxoacid metabolic process                                | 24   | 21  | 3    |

|            |                                                   |     |     |    |
|------------|---------------------------------------------------|-----|-----|----|
|            | organic acid metabolic process                    | 24  | 21  | 3  |
|            | cellular amino acid metabolic process             | 19  | 18  | 1  |
|            | alpha-amino acid metabolic process                | 14  | 14  | -  |
|            | small molecule catabolic process                  | 10  | 10  | -  |
|            | aromatic amino acid family metabolic process      | 9   | 9   | -  |
|            | alpha-amino acid catabolic process                | 9   | 9   | -  |
|            | cellular amino acid catabolic process             | 9   | 9   | -  |
|            | carboxylic acid catabolic process                 | 9   | 9   | -  |
|            | organic acid catabolic process                    | 9   | 9   | -  |
|            | drug catabolic process                            | 8   | 8   | -  |
|            | de novo IMP biosynthetic process                  | 7   | 7   | -  |
|            | IMP biosynthetic process                          | 7   | 7   | -  |
|            | IMP metabolic process                             | 7   | 7   | -  |
|            | serine family amino acid metabolic process        | 6   | 6   | -  |
|            | aromatic amino acid family catabolic process      | 5   | 5   | -  |
|            | purine nucleobase biosynthetic process            | 5   | 5   | -  |
|            | L-phenylalanine metabolic process                 | 4   | 4   | -  |
|            | L-phenylalanine catabolic process                 | 4   | 4   | -  |
|            | erythrose 4-phosphate/phosphoenolpyruvate...      | 4   | 4   | -  |
|            | erythrose 4-phosphate/phosphoenolpyruvate...      | 4   | 4   | -  |
| 38 vs 32°C | catalytic activity                                | 139 | 120 | 19 |
|            | oxidoreductase activity                           | 48  | 42  | 6  |
|            | transaminase activity                             | 9   | 9   | -  |
|            | transferase activity, transferring nitrogenous    | 9   | 9   | -  |
|            | oxidation-reduction process                       | 36  | 31  | 5  |
|            | small molecule metabolic process                  | 36  | 35  | 1  |
|            | carboxylic acid metabolic process                 | 22  | 21  | 1  |
|            | oxoacid metabolic process                         | 22  | 21  | 1  |
|            | organic acid metabolic process                    | 22  | 21  | 1  |
|            | cellular amino acid metabolic process             | 19  | 18  | 1  |
|            | small molecule catabolic process                  | 11  | 11  | -  |
|            | alpha-amino acid metabolic process                | 11  | 11  | -  |
|            | de novo IMP biosynthetic process                  | 9   | 9   | -  |
|            | IMP biosynthetic process                          | 9   | 9   | -  |
|            | IMP metabolic process                             | 9   | 9   | -  |
|            | aromatic amino acid family metabolic process      | 9   | 9   | -  |
|            | alpha-amino acid catabolic process                | 9   | 9   | -  |
|            | cellular amino acid catabolic process             | 9   | 9   | -  |
|            | carboxylic acid catabolic process                 | 9   | 9   | -  |
|            | organic acid catabolic process                    | 9   | 9   | -  |
|            | purine nucleoside monophosphate biosynthetic      | 9   | 9   | -  |
|            | purine ribonucleoside monophosphate biosynthetic  | 9   | 9   | -  |
|            | purine nucleoside monophosphate metabolic process | 9   | 9   | -  |
|            | purine ribonucleoside monophosphate metabolic     | 9   | 9   | -  |

|                                                   |   |   |   |
|---------------------------------------------------|---|---|---|
| ribonucleoside monophosphate biosynthetic process | 9 | 9 | - |
| ribonucleoside monophosphate metabolic process    | 9 | 9 | - |
| pigment biosynthetic process                      | 8 | 8 | - |
| pigment metabolic process                         | 8 | 8 | - |
| purine nucleobase biosynthetic process            | 7 | 7 | - |
| purine nucleobase metabolic process               | 7 | 7 | - |

Note: “All” indicates the number of all DEGs; “Up” indicates the number of up-regulated genes; “Down” indicates the number of down-regulated genes; “-” indicates no DEGs.

**Supplemental Table S2.** KEGG enrichment analysis (the DEGs number in per pathway) of adults of *P. quatuordecimpunctata* under different temperature stress.

| Groups     | Pathway ID                                          | DEGs |    |      |
|------------|-----------------------------------------------------|------|----|------|
|            |                                                     | All  | Up | Down |
| 35 vs 32°C | Steroid hormone biosynthesis                        | 6    | 6  | -    |
|            | Starch and sucrose metabolism                       | 11   | 10 | 1    |
|            | Rheumatoid arthritis                                | 6    | 4  | 2    |
|            | Retinol metabolism                                  | 6    | 6  | -    |
|            | Regulation of lipolysis in adipocytes               | 5    | 5  | -    |
|            | Proteoglycans in cancer                             | 13   | 11 | 2    |
|            | Protein digestion and absorption                    | 7    | 7  | -    |
|            | Porphyrin and chlorophyll metabolism                | 4    | 4  | -    |
|            | Pentose and glucuronate interconversions            | 5    | 5  | -    |
|            | Metabolic pathways                                  | 42   | 35 | 7    |
|            | Lysosome                                            | 12   | 9  | 3    |
|            | Glycerolipid metabolism                             | 5    | 3  | 2    |
|            | Drug metabolism – other enzymes                     | 9    | 6  | 3    |
|            | Drug metabolism – cytochrome P450                   | 6    | 6  | -    |
|            | Chemical carcinogenesis                             | 7    | 7  | -    |
|            | Caffeine metabolism                                 | 2    | -  | 2    |
|            | Ascorbate and aldarate metabolism                   | 5    | 5  | -    |
|            | Apoptosis                                           | 8    | 5  | 3    |
|            | Antigen processing and presentation                 | 7    | 4  | 3    |
|            | ABC transporters                                    | 5    | 5  | -    |
| 38 vs 35°C | Tyrosine metabolism                                 | 8    | 6  | 2    |
|            | Steroid hormone biosynthesis                        | 18   | 13 | 5    |
|            | Starch and sucrose metabolism                       | 10   | 4  | 6    |
|            | Retinol metabolism                                  | 18   | 13 | 5    |
|            | Phenylalanine, tyrosine and tryptophan biosynthesis | 5    | 5  | -    |
|            | Phenylalanine metabolism                            | 8    | 7  | 1    |
|            | Pentose and glucuronate interconversions            | 8    | 4  | 4    |
|            | One carbon pool by folate                           | 9    | 9  | -    |
|            | Metabolic pathways                                  | 113  | 87 | 26   |
|            | Linoleic acid metabolism                            | 11   | 8  | 3    |
|            | Glycine, serine and threonine metabolism            | 23   | 23 | -    |

|            |                                                     |    |    |    |
|------------|-----------------------------------------------------|----|----|----|
|            | Fatty acid metabolism                               | 10 | 9  | 1  |
|            | Fatty acid elongation                               | 7  | 6  | 1  |
|            | Fat digestion and absorption                        | 8  | 4  | 4  |
|            | Drug metabolism – other enzymes                     | 8  | 5  | 3  |
|            | Chemical carcinogenesis                             | 18 | 13 | 5  |
|            | Biosynthesis of amino acids                         | 14 | 14 | -  |
|            | Bile secretion                                      | 13 | 9  | 4  |
|            | Ascorbate and aldarate metabolism                   | 9  | 5  | 4  |
|            | ABC transporters                                    | 11 | 3  | 8  |
| 38 vs 32°C | Valine, leucine and isoleucine degradation          | 7  | 6  | 1  |
|            | Ubiquinone and other terpenoid–quinone biosynthesis | 5  | 5  | -  |
|            | Tyrosine metabolism                                 | 7  | 6  | 1  |
|            | Steroid hormone biosynthesis                        | 11 | 11 | -  |
|            | Retinol metabolism                                  | 9  | 8  | 1  |
|            | Purine metabolism                                   | 14 | 11 | 3  |
|            | Phenylalanine, tyrosine and tryptophan biosynthesis | 6  | 6  | -  |
|            | Phenylalanine metabolism                            | 8  | 8  | -  |
|            | One carbon pool by folate                           | 9  | 9  | -  |
|            | Metabolic pathways                                  | 91 | 80 | 11 |
|            | Lysosome                                            | 16 | 14 | 2  |
|            | Glycine, serine and threonine metabolism            | 20 | 20 | -  |
|            | Fatty acid metabolism                               | 12 | 12 | -  |
|            | Fatty acid elongation                               | 7  | 7  | -  |
|            | Fatty acid biosynthesis                             | 6  | 6  | -  |
|            | Fat digestion and absorption                        | 7  | 6  | 1  |
|            | Cysteine and methionine metabolism                  | 9  | 9  | -  |
|            | Chemical carcinogenesis                             | 11 | 11 | -  |
|            | Biosynthesis of unsaturated fatty acids             | 6  | 6  | -  |
|            | Biosynthesis of amino acids                         | 16 | 15 | 1  |

Note: “All” indicates the number of all DEGs; “Up” indicates the number of up-regulated genes; “Down” indicates the number of down-regulated genes; “-” indicates no DEGs.
