# Supplementary material for: Transcriptome Analysis of Propylaea quatuordecimpunctata L. (Coleoptera: Coccinellidae) under High Temperature Stress
Source: MDPI journal article supplement (doi:10.3390/agriculture12081088), 2022-07-23
Supplement: s1 [file s1]

Archive with 1 entries (1 files):
- agriculture-1797712-supplementary.pdf
